# Supplementary material for: Efficient simultaneous emission from RGB-emitting organoboron dyes incorporated into organic–inorganic hybrids and preparation of white light-emitting materials
Source: Royal Society of Chemistry journal article supplement (doi:10.1039/c3tc30276h), 2013-01-01
Supplement: c3tc30276h.pdf [file c3tc30276h.pdf]

## Supporting Information

### **Efficient Simultaneous Emission from RGB-Emitting Organoboron Dyes Incorporated into Organic–Inorganic Hybrids and Preparation of White Light-Emitting Materials**

Yuichi Kajiwara,<sup>†,‡</sup> Atsushi Nagai,<sup>†,§</sup>, Kazuo Tanaka,<sup>†</sup> and Yoshiki Chujo<sup>\*†</sup>

<sup>†</sup>*Department of Polymer Chemistry, Graduate School of Engineering, Kyoto University, Katsura, Nishikyo-ku, Kyoto 615-8510, Japan*

<sup>‡</sup>*Matsumoto Yushi-Seiyaku Co., Ltd., 2-1-3, Shibukawa-cho, Yao-City, Osaka 581-0075, Japan*

<sup>§</sup>*Department of Materials Molecular Science, Institute for Molecular Science, 5-1 Higashiyama, Myodaiji, Okazaki 444-8787, Japan.*

Phone: +81-75-383-2604

Fax: +81-75-383-2605

\*To whom correspondence should be addressed: [chujo@chujo.synchem.kyoto-u.ac.jp](mailto:chujo@chujo.synchem.kyoto-u.ac.jp)

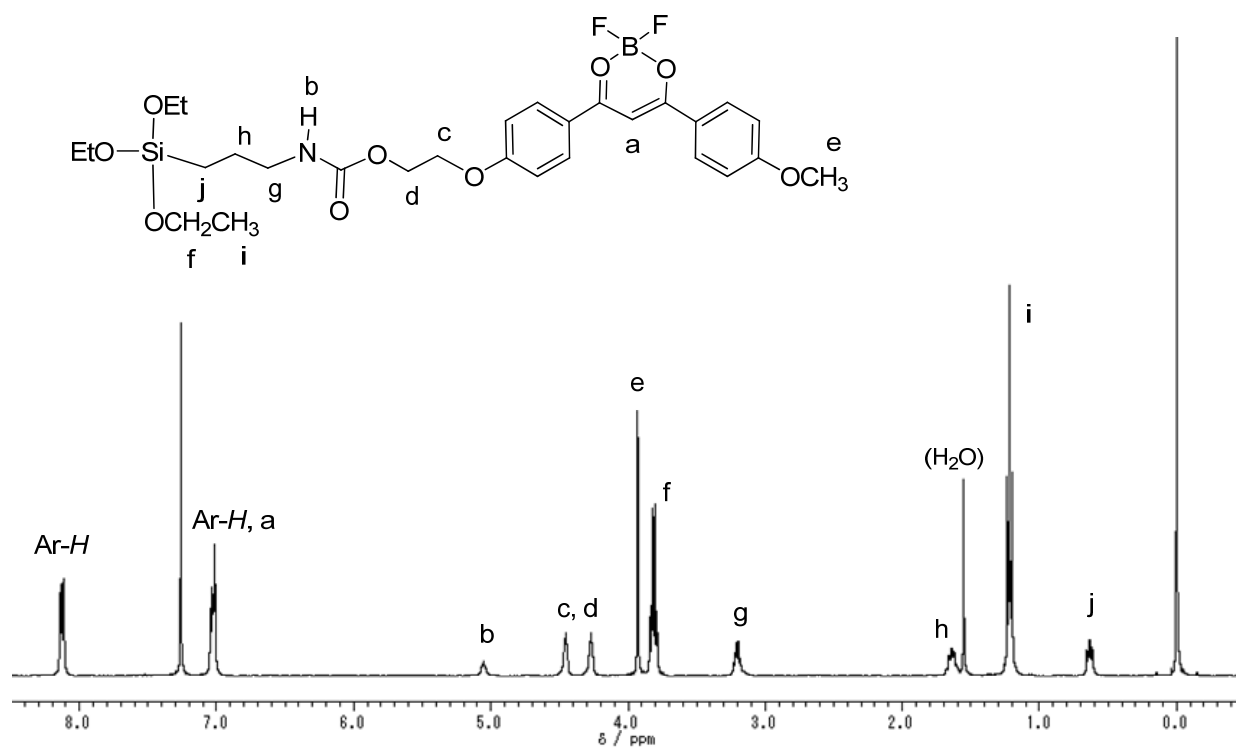

**Figure S1.** <sup>1</sup>H NMR spectrum of dye 1.

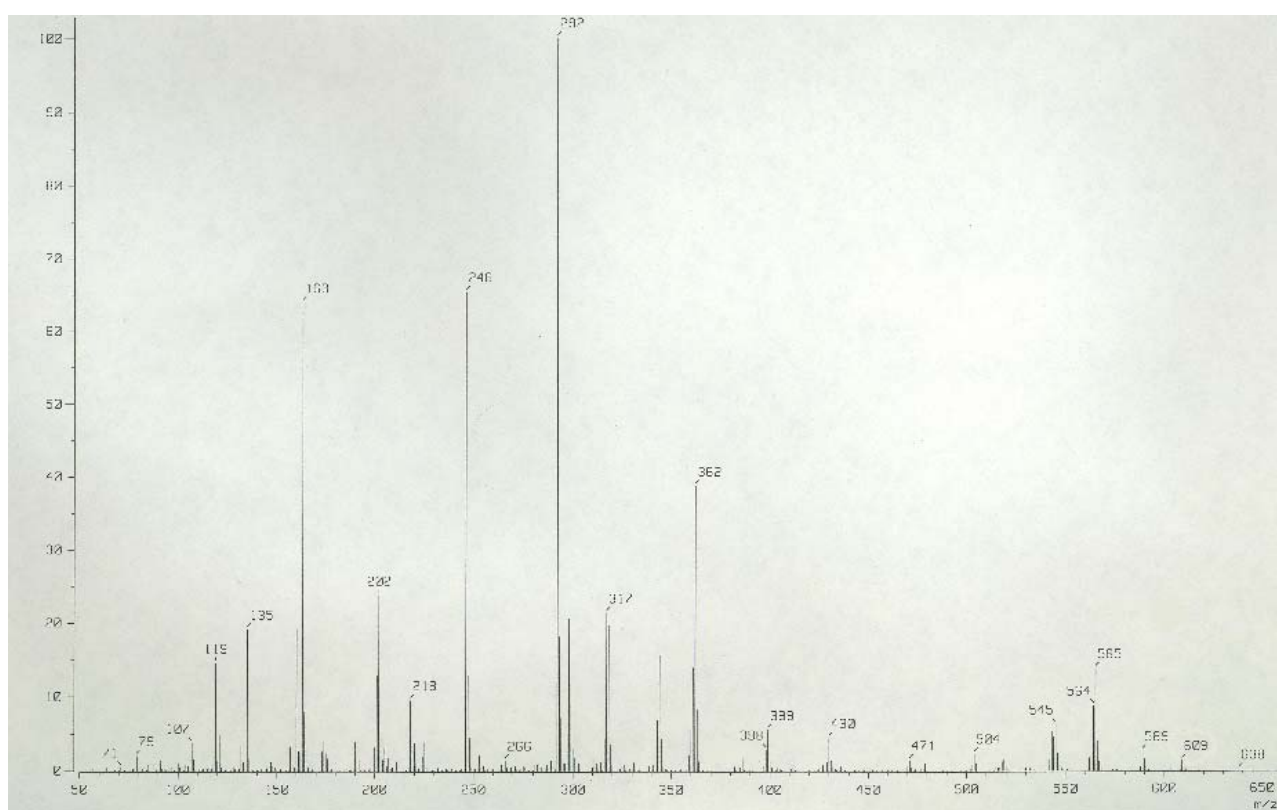

**Figure S2.** HRMS spectrum of dye 1.

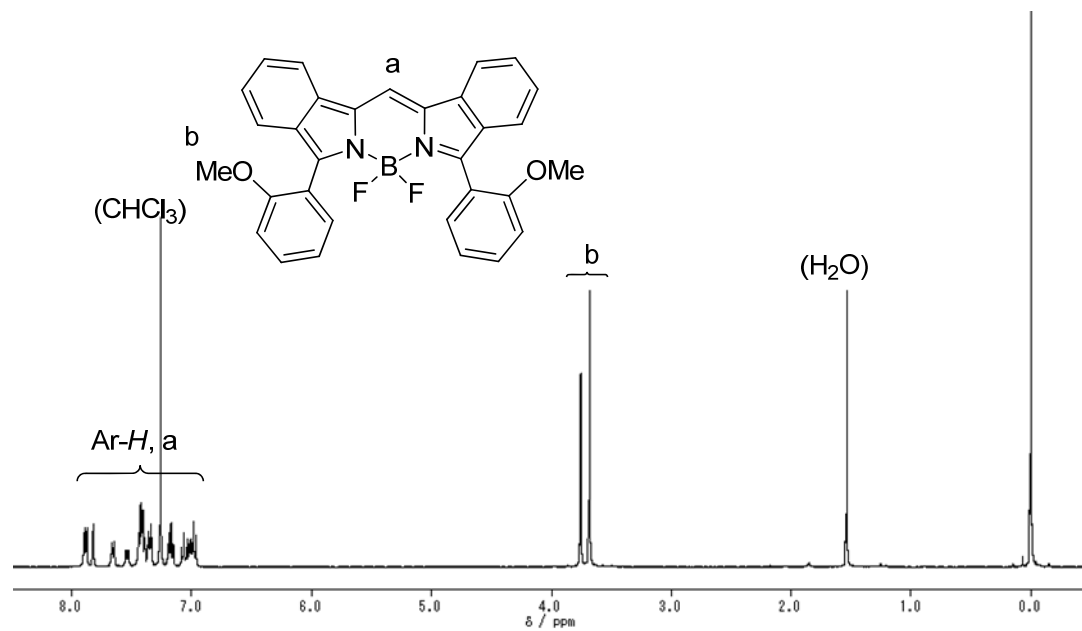

**Figure S3.**  $^1\text{H}$  NMR spectrum of dye 3.

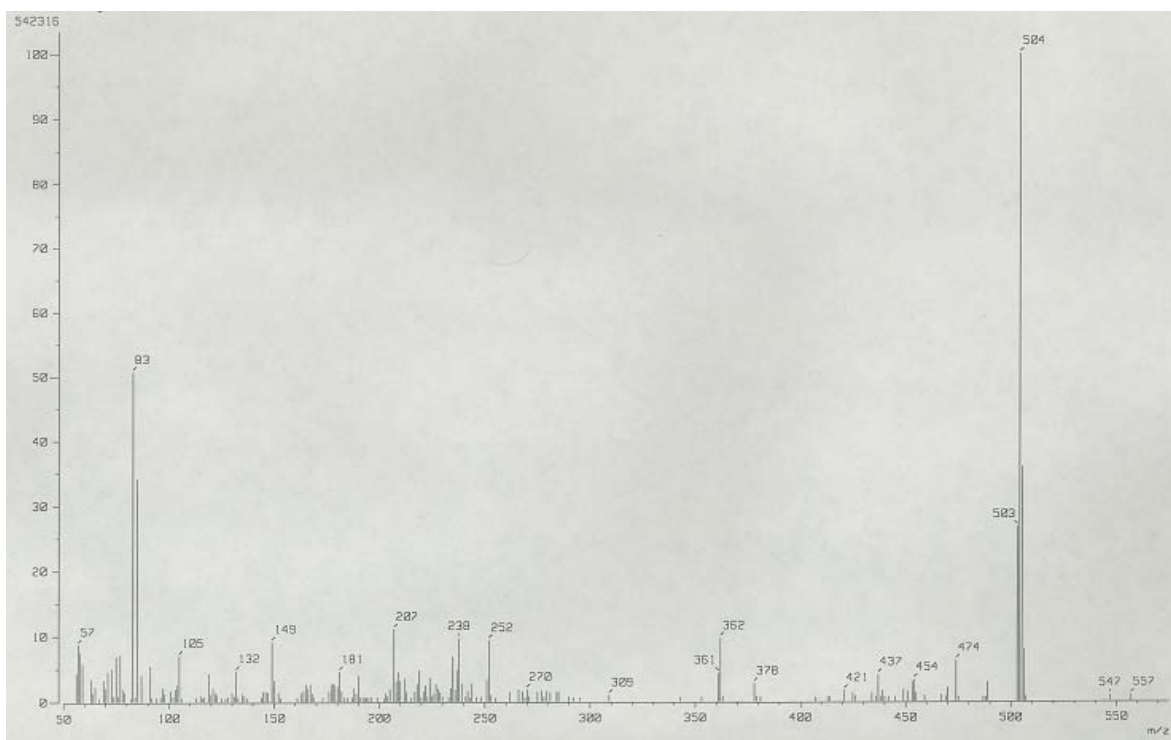

**Figure S4.** HRMS spectrum of dye **3**.
